# Supplementary material for: Disease Surveillance Methods Used in the 8-Site MAL-ED Cohort Study
Source: Oxford University Press journal article supplement (doi:10.1093/cid/ciu435), 2014-10-10
Supplement: ciu435_Supplementary_Data.zip [file ciu435_Supplementary_Data.zip]

Child ID:

MMM/YY:  /

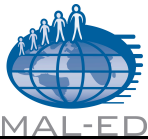

| SURVEILLANCE ASSESSMENT FORM (SAF)                                                                                                                                                                                                                                                                                                                                                                                                    |                              |   |   |   |   |   |   |   |   |   |    |    |    |    |    |    |    |    |    |    |    |    |    |    |    |    |    |    |    |    |    |    |
|---------------------------------------------------------------------------------------------------------------------------------------------------------------------------------------------------------------------------------------------------------------------------------------------------------------------------------------------------------------------------------------------------------------------------------------|------------------------------|---|---|---|---|---|---|---|---|---|----|----|----|----|----|----|----|----|----|----|----|----|----|----|----|----|----|----|----|----|----|----|
| 01                                                                                                                                                                                                                                                                                                                                                                                                                                    | Date                         | 1 | 2 | 3 | 4 | 5 | 6 | 7 | 8 | 9 | 10 | 11 | 12 | 13 | 14 | 15 | 16 | 17 | 18 | 19 | 20 | 21 | 22 | 23 | 24 | 25 | 26 | 27 | 28 | 29 | 30 | 31 |
| 02                                                                                                                                                                                                                                                                                                                                                                                                                                    | Visit today?                 |   |   |   |   |   |   |   |   |   |    |    |    |    |    |    |    |    |    |    |    |    |    |    |    |    |    |    |    |    |    |    |
| 03                                                                                                                                                                                                                                                                                                                                                                                                                                    | # times                      |   |   |   |   |   |   |   |   |   |    |    |    |    |    |    |    |    |    |    |    |    |    |    |    |    |    |    |    |    |    |    |
| 04                                                                                                                                                                                                                                                                                                                                                                                                                                    | Field researcher             |   |   |   |   |   |   |   |   |   |    |    |    |    |    |    |    |    |    |    |    |    |    |    |    |    |    |    |    |    |    |    |
| <b>Current health status.</b> Ask about all days since last visit (Yes=1, No=0, NA). <sup>1</sup> Choices for ACTIVITY LEVEL (normal=0, sleepy=1, difficult to awaken=2). <sup>2</sup> Choices for ORAL INTAKE (normal or more=0, less than normal=1). <sup>3</sup> Choices for ANTIBIOTICS (Penicillin=1; Cephalosporins=2; Sulfonamides=3; Macrolides=4; Tetracyclines=5; Fluoroquinolones=6; Unknown=7; Metronidazole=8; Other=9). |                              |   |   |   |   |   |   |   |   |   |    |    |    |    |    |    |    |    |    |    |    |    |    |    |    |    |    |    |    |    |    |    |
| 05                                                                                                                                                                                                                                                                                                                                                                                                                                    | Illness?                     |   |   |   |   |   |   |   |   |   |    |    |    |    |    |    |    |    |    |    |    |    |    |    |    |    |    |    |    |    |    |    |
| 06                                                                                                                                                                                                                                                                                                                                                                                                                                    | Activity level? <sup>1</sup> |   |   |   |   |   |   |   |   |   |    |    |    |    |    |    |    |    |    |    |    |    |    |    |    |    |    |    |    |    |    |    |
| 07                                                                                                                                                                                                                                                                                                                                                                                                                                    | Oral intake? <sup>2</sup>    |   |   |   |   |   |   |   |   |   |    |    |    |    |    |    |    |    |    |    |    |    |    |    |    |    |    |    |    |    |    |    |
| 08                                                                                                                                                                                                                                                                                                                                                                                                                                    | Vomiting?                    |   |   |   |   |   |   |   |   |   |    |    |    |    |    |    |    |    |    |    |    |    |    |    |    |    |    |    |    |    |    |    |
| 09                                                                                                                                                                                                                                                                                                                                                                                                                                    | Ear pain / pulling?          |   |   |   |   |   |   |   |   |   |    |    |    |    |    |    |    |    |    |    |    |    |    |    |    |    |    |    |    |    |    |    |
| 10                                                                                                                                                                                                                                                                                                                                                                                                                                    | Antibiotic use?              |   |   |   |   |   |   |   |   |   |    |    |    |    |    |    |    |    |    |    |    |    |    |    |    |    |    |    |    |    |    |    |
| 11                                                                                                                                                                                                                                                                                                                                                                                                                                    | Antibiotic type <sup>3</sup> |   |   |   |   |   |   |   |   |   |    |    |    |    |    |    |    |    |    |    |    |    |    |    |    |    |    |    |    |    |    |    |
| <b>Gastrointestinal illness.</b> Ask about all days since last visit (Yes=1, No=0, NA). <sup>4</sup> Choices for DEHYDRATED (None=0, Some=1, Severe=2).                                                                                                                                                                                                                                                                               |                              |   |   |   |   |   |   |   |   |   |    |    |    |    |    |    |    |    |    |    |    |    |    |    |    |    |    |    |    |    |    |    |
| 12                                                                                                                                                                                                                                                                                                                                                                                                                                    | Diarrhea?                    |   |   |   |   |   |   |   |   |   |    |    |    |    |    |    |    |    |    |    |    |    |    |    |    |    |    |    |    |    |    |    |
| 13                                                                                                                                                                                                                                                                                                                                                                                                                                    | # loose stools?              |   |   |   |   |   |   |   |   |   |    |    |    |    |    |    |    |    |    |    |    |    |    |    |    |    |    |    |    |    |    |    |
| 14                                                                                                                                                                                                                                                                                                                                                                                                                                    | Blood in stool?              |   |   |   |   |   |   |   |   |   |    |    |    |    |    |    |    |    |    |    |    |    |    |    |    |    |    |    |    |    |    |    |
| 15                                                                                                                                                                                                                                                                                                                                                                                                                                    | Dehydrated? <sup>4</sup>     |   |   |   |   |   |   |   |   |   |    |    |    |    |    |    |    |    |    |    |    |    |    |    |    |    |    |    |    |    |    |    |
| 16                                                                                                                                                                                                                                                                                                                                                                                                                                    | ORT administered?            |   |   |   |   |   |   |   |   |   |    |    |    |    |    |    |    |    |    |    |    |    |    |    |    |    |    |    |    |    |    |    |
| 17                                                                                                                                                                                                                                                                                                                                                                                                                                    | Sample collected?            |   |   |   |   |   |   |   |   |   |    |    |    |    |    |    |    |    |    |    |    |    |    |    |    |    |    |    |    |    |    |    |
| <b>Respiratory illness.</b> Ask about all days since last visit. If answer to question 18 or 19 is YES in the past 24 hours, look for chest indrawing and record respiratory rate (breaths/minute) twice.                                                                                                                                                                                                                             |                              |   |   |   |   |   |   |   |   |   |    |    |    |    |    |    |    |    |    |    |    |    |    |    |    |    |    |    |    |    |    |    |
| 18                                                                                                                                                                                                                                                                                                                                                                                                                                    | Cough?                       |   |   |   |   |   |   |   |   |   |    |    |    |    |    |    |    |    |    |    |    |    |    |    |    |    |    |    |    |    |    |    |
| 19                                                                                                                                                                                                                                                                                                                                                                                                                                    | Short of breath?             |   |   |   |   |   |   |   |   |   |    |    |    |    |    |    |    |    |    |    |    |    |    |    |    |    |    |    |    |    |    |    |
| 20                                                                                                                                                                                                                                                                                                                                                                                                                                    | Indrawing?                   |   |   |   |   |   |   |   |   |   |    |    |    |    |    |    |    |    |    |    |    |    |    |    |    |    |    |    |    |    |    |    |
| 21                                                                                                                                                                                                                                                                                                                                                                                                                                    | Respiratory rate 1           |   |   |   |   |   |   |   |   |   |    |    |    |    |    |    |    |    |    |    |    |    |    |    |    |    |    |    |    |    |    |    |
| 22                                                                                                                                                                                                                                                                                                                                                                                                                                    | Respiratory rate 2           |   |   |   |   |   |   |   |   |   |    |    |    |    |    |    |    |    |    |    |    |    |    |    |    |    |    |    |    |    |    |    |
| 23                                                                                                                                                                                                                                                                                                                                                                                                                                    | ALRI?                        |   |   |   |   |   |   |   |   |   |    |    |    |    |    |    |    |    |    |    |    |    |    |    |    |    |    |    |    |    |    |    |
| <b>Other information.</b> Ask about fever on all days since last visit (Yes=1, No=0, NA). If answer to question 24 is YES in the past 24 hours, record temperature (XX.X °C).                                                                                                                                                                                                                                                         |                              |   |   |   |   |   |   |   |   |   |    |    |    |    |    |    |    |    |    |    |    |    |    |    |    |    |    |    |    |    |    |    |
| 24                                                                                                                                                                                                                                                                                                                                                                                                                                    | Fever?                       |   |   |   |   |   |   |   |   |   |    |    |    |    |    |    |    |    |    |    |    |    |    |    |    |    |    |    |    |    |    |    |
| 25                                                                                                                                                                                                                                                                                                                                                                                                                                    | Temperature °C               |   |   |   |   |   |   |   |   |   |    |    |    |    |    |    |    |    |    |    |    |    |    |    |    |    |    |    |    |    |    |    |
| 26                                                                                                                                                                                                                                                                                                                                                                                                                                    | Referral made?               |   |   |   |   |   |   |   |   |   |    |    |    |    |    |    |    |    |    |    |    |    |    |    |    |    |    |    |    |    |    |    |
| 27                                                                                                                                                                                                                                                                                                                                                                                                                                    | Nursing notes?               |   |   |   |   |   |   |   |   |   |    |    |    |    |    |    |    |    |    |    |    |    |    |    |    |    |    |    |    |    |    |    |
