# Supplementary material for: Disease Surveillance Methods Used in the 8-Site MAL-ED Cohort Study
Source: Oxford University Press journal article supplement (doi:10.1093/cid/ciu435), 2014-10-10
Supplement: ciu435_Supplementary_Data.zip [file ciu435_Supplementary_Data.zip]

Archive with 1 entries (1 files):
- ciu435supp.pdf
